# Supplementary material
Source: publisher figshare collection journal article supplement (https://tandf.figshare.com/ndownloader/files/13526351)
Supplement: Supplementary file 1 [file 13526351]

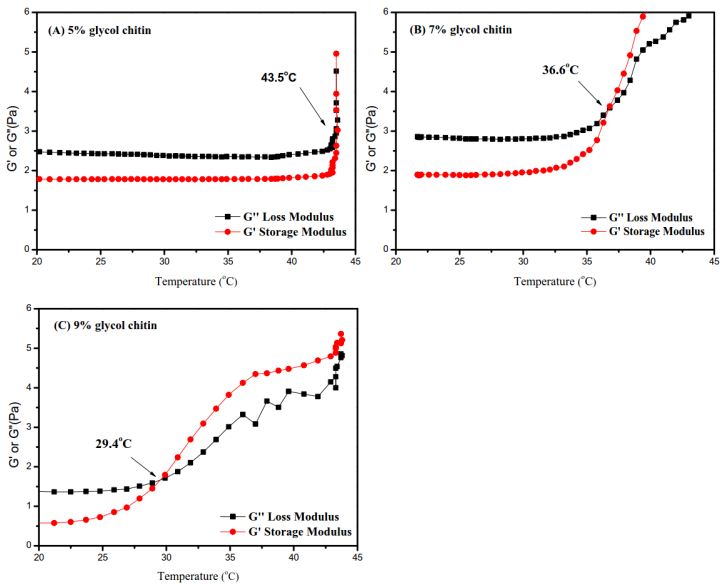


Fig.S1 Rheological behavior of glycol chitin with different concentrations: (A) 5%, (B) 7%, and (C) 9% glycol chitin.


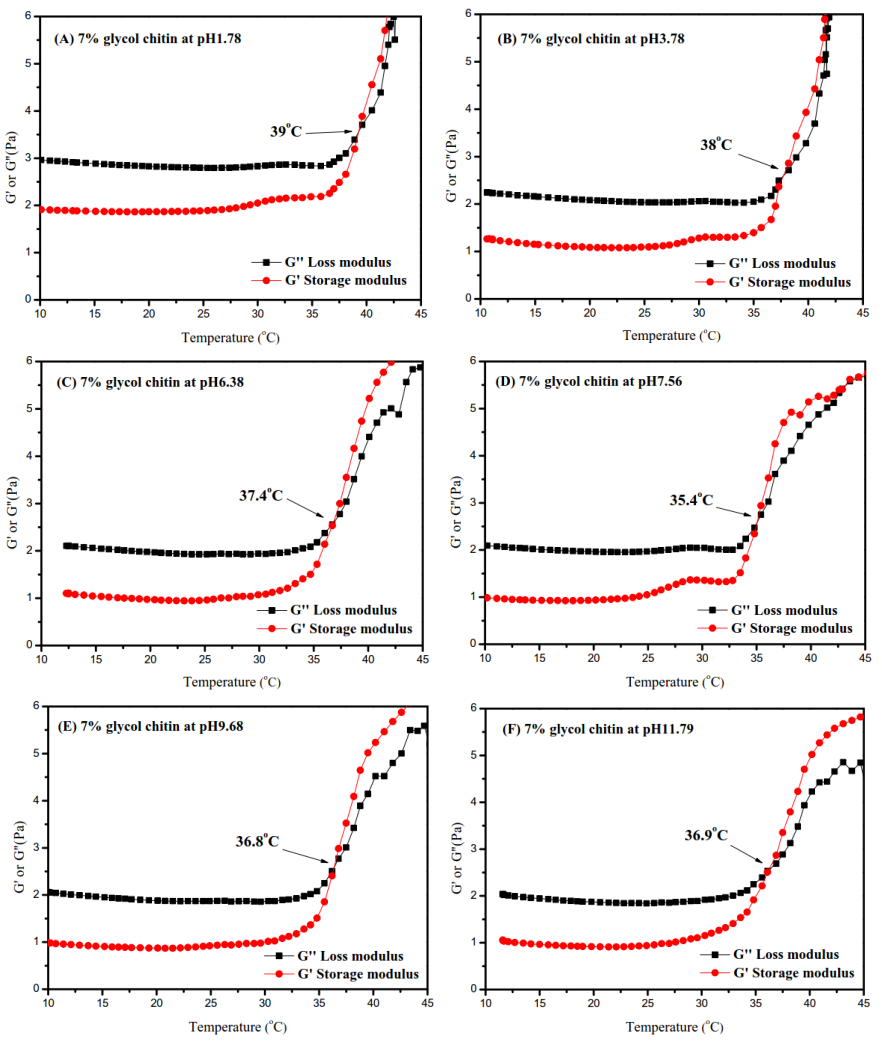


Fig. S2 Rheological behavior of 7% glycol chitin with different pH: (A) pH 1.78, (B) pH 3.78, (C) pH 6.38, (D) pH 7.56, (E) pH 9.68, and (F) pH 11.79.


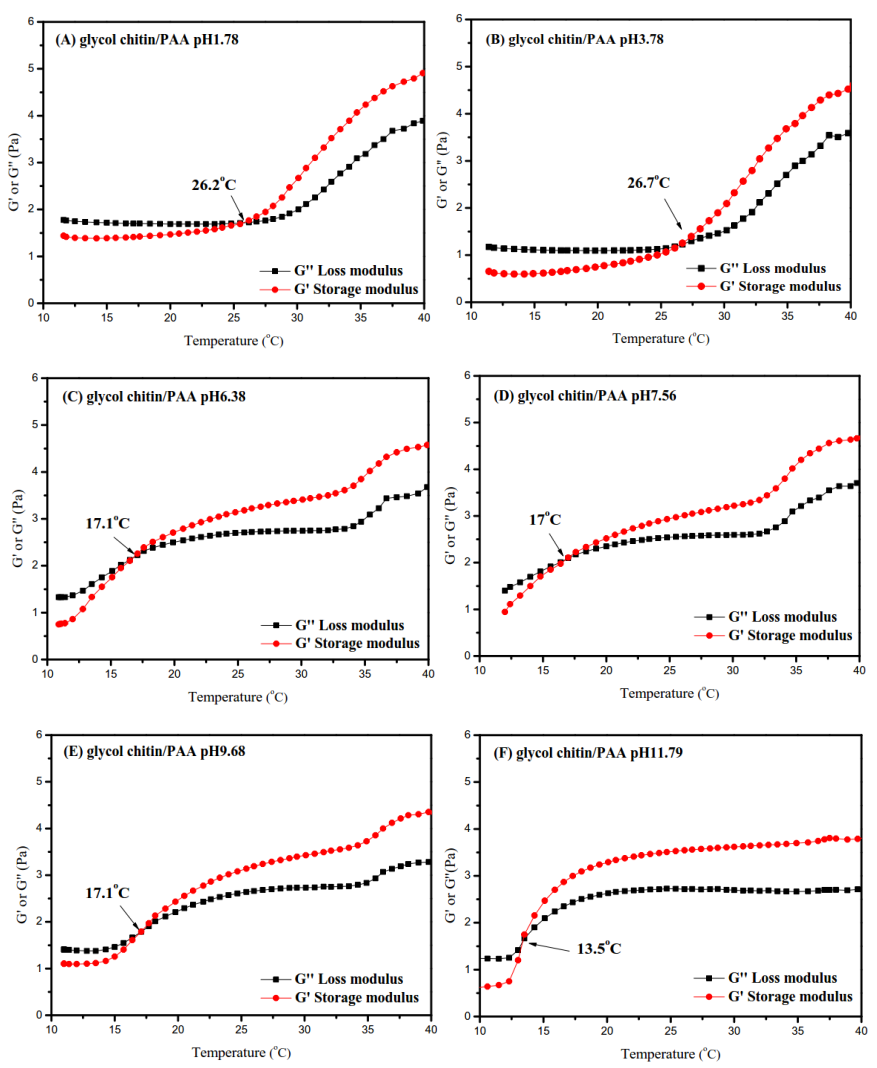


Fig. S3 Rheological behavior of glycol chitin/PAA with different pH (with fixed concentration of 7 wt% glycol chitin): (A) pH 1.78, (B) pH 3.78, (C) pH 6.38, (D) pH 7.56, (E) pH 9.68, and (F) pH 11.79.
